1 **Modeling the growth and decline of pathogen effective**  
2 **population size provides insight into epidemic**  
3 **dynamics and drivers of antimicrobial resistance**

4 ERIK M. VOLZ<sup>1</sup> AND XAVIER DIDELOT<sup>1</sup>

5 <sup>1</sup>*Department of Infectious Disease Epidemiology, Imperial College London,*  
6 *Norfolk Place, W2 1PG, United Kingdom*

7 **Corresponding author:** Erik Volz, Department of Infectious Disease Epidemiology,  
8 Imperial College London, Norfolk Place, W2 1PG, United Kingdom; E-mail:  
9 e.volz@imperial.ac.uk

## ABSTRACT

10

11 Non-parametric population genetic modeling provides a simple and flexible approach for  
12 studying demographic history and epidemic dynamics using pathogen sequence data.  
13 Existing Bayesian approaches are premised on stationary stochastic processes which may  
14 provide an unrealistic prior for epidemic histories which feature extended period of  
15 exponential growth or decline. We show that non-parametric models defined in terms of  
16 the growth rate of the effective population size can provide a more realistic prior for  
17 epidemic history. We propose a non-parametric autoregressive model on the growth rate as  
18 a prior for effective population size, which corresponds to the dynamics expected under  
19 many epidemic situations. We demonstrate the use of this model within a Bayesian  
20 phylodynamic inference framework. Our method correctly reconstructs trends of epidemic  
21 growth and decline from pathogen genealogies even when genealogical data is sparse and  
22 conventional skyline estimators erroneously predict stable population size. We also propose  
23 a regression approach for relating growth rates of pathogen effective population size and  
24 time-varying variables that may impact the replicative fitness of a pathogen. The model is  
25 applied to real data from rabies virus and *Staphylococcus aureus* epidemics. We find a close  
26 correspondence between the estimated growth rates of a lineage of methicillin-resistant *S.*  
27 *aureus* and population-level prescription rates of  $\beta$ -lactam antibiotics. The new models are  
28 implemented in an open source R package called *skygrowth* which is available at  
29 <https://mrc-ide.github.io/skygrowth/>.

30 (Keywords: phylodynamics, effective population size, growth rate, *skygrowth* ,  
31 antimicrobial resistance, MRSA)

32 Non-parametric population genetic modeling has emerged as a simple, flexible,  
33 popular and powerful tool for interrogating genetic sequence data to reveal demographic  
34 history (Ho and Shapiro 2011). This approach has proved especially useful for analysis of  
35 pathogen sequence data to reconstruct epidemic history and such models are increasingly  
36 incorporated into surveillance systems for infectious diseases (Volz et al. 2013). The most  
37 commonly used techniques are derivatives of the original *skyline* coalescent model, which  
38 describes the evolution of effective population size as a piecewise constant function of time  
39 (Pybus et al. 2000). The basic *skyline* model is prone to overfitting and estimating drastic  
40 fluctuations in effective population size, so that numerous approaches were subsequently  
41 developed for smoothing population size trajectories. Initial approaches to smoothing  
42 *skyline* estimators were based on aggregating adjacent coalescent intervals within a  
43 maximum likelihood framework (Strimmer and Pybus 2001). Subsequent development has  
44 largely focused on Bayesian approaches where a more complex stochastic diffusion process  
45 provides a prior for the evolution of a piecewise-constant function of effective population  
46 size (Drummond et al. 2005). Non-parametric Bayesian approaches are now the most  
47 popular approach for phylodynamic inference and such approaches have illuminated the  
48 epidemic history of numerous pathogens in humans and animals (Ho and Shapiro 2011).

49 To date, all Bayesian non-parametric models have assumed that the effective  
50 population size (or its logarithm) follows a stationary stochastic process such as a  
51 Brownian motion (Minin et al. 2008; Palacios and Minin 2013). The choice of a stationary  
52 process as prior can have large influence on size estimates especially when genealogical data  
53 is sparse and uninformative. Genealogies often provide very little information about  
54 effective population size near the present (or most recent sample), especially in  
55 exponentially increasing populations (de Silva et al. 2012). In such cases, *skyline* estimators  
56 with Brownian motion priors on the effective population size may produce estimates which  
57 stabilize at a constant level even when the true size is increasing or decreasing

58 exponentially. We argue that in many situations, a more realistic prior can be defined in  
59 terms of the growth rate of the effective population size. Below, we describe such a prior  
60 based on a simple autoregressive stochastic process defined on the growth rate of effective  
61 population size. We show how this prior can lead to substantially different estimates and  
62 argue that these estimates are more accurate in many situations. When genealogical data is  
63 sparse, our model will retain the growth rate learned from other parts of the genealogy and  
64 will correctly capture trends of exponential growth or decline. Even though our approach is  
65 non-parametric, we consider its relationship with parametric models of epidemic population  
66 genetics to show that our estimates of growth rates of pathogen effective population size  
67 are often likely to correspond to growth rates of an infectious disease epidemic.

68         Smoothing effective population size trajectories using a prior on growth rates also  
69 has important advantages when incorporating non-genetic covariate data into  
70 phylodynamic inference (Baele et al. 2016). Recent work has focused on refining effective  
71 population size estimates using both the times of sequencing sampling (Karcher et al.  
72 2016) or using environmental data which are expected to correlate with size estimates, such  
73 as independent epidemic size estimates based on non-genetic data (Gill et al. 2016).  
74 Existing statistical models have assumed that the effective population size has a linear or  
75 log-linear relationship with temporal covariates. However in many cases, a more realistic  
76 model would specify that the growth rate of effective population size is correlated with  
77 covariates, as when for example an environmental variable impacts the replicative fitness of  
78 a pathogen. We provide a similar extension of previous *skyride* models with covariate data  
79 (Gill et al. 2016) to show how such data can be used to test hypotheses concerning their  
80 effect and, when a significant effect exists, to refine estimates of both the growth rates and  
81 the effective population sizes.

82         We illustrate the potential advantages of our growth rate model using a rabies virus  
83 dataset that has been thoroughly studied using previous phylodynamic methods (Biek

84 et al. 2007; Gill et al. 2016). In particular, we show how our model correctly estimates a  
85 recent decline in epidemic size whereas previous models mistakenly predict a stabilisation  
86 of the epidemic prevalence. We also apply our methodology to a genomic dataset of  
87 methicilin-resistant *Staphylococcus aureus* that had not formally been analysed using  
88 phylodynamic methods (Uhlemann et al. 2014). We show how time series on prescription  
89 rates of  $\beta$ -lactam antibiotics correlate strongly with growth and decline of the effective  
90 population size, revealing the impact of antibiotic use on the emergence and spread of  
91 resistant bacterial pathogens.

## 92 METHODS AND MATERIALS

93 We model effective population size through time as a first order autoregressive  
94 stochastic process on the growth rate. This provides an intuitive link between the growth  
95 rate of effective population size of pathogens and epidemic size as well as the reproduction  
96 number of the epidemic. We further show how to incorporate time-varying environmental  
97 covariates into phylodynamic inference.

### 98 *Previous Bayesian non-parametric phylodynamic models*

Several non-parametric phylodynamic models have been proposed based on Brownian motion (BM) processes and the Kingman coalescent genealogical model (Kingman 1982). In particular, the Bayesian non-parametric *skyride* model uses a BM prior to smooth trajectories of the logarithm of the effective population size (Minin et al. 2008). Let  $\gamma(t) = \log(Ne(t))$  denote the logarithm of the effective population size as a function of time. The BM prior is defined as:

$$\gamma(t + dt) \sim \gamma(t) + \mathcal{N}(0, dt/\tau) \quad (1)$$

99 where  $\tau$  is an estimated precision parameter, for which an uninformative Gamma prior is  
100 typically used.

This BM prior has been adapted and applied in a variety of ways to enable statistical inference. In the *skygrid* model (Gill et al. 2012), time is discretized and  $\gamma$  is defined to be a piecewise constant function of time over a grid with time increments  $h$ , and the value  $\gamma_i$  is estimated for each interval  $i$ . Time intervals do not in general correspond to coalescent times in the genealogy. In this case, the BM prior is computed over increments of  $\gamma$ :

$$p(\gamma_{1:m}|\tau) \propto \prod_{i=1}^{m-1} p(\gamma_{i+1} - \gamma_i|\tau) \quad (2)$$

where

$$p(\gamma_{i+1} - \gamma_i|\tau) = \sqrt{\frac{\tau}{2\pi h}} e^{-\frac{\tau}{2h}(\gamma_{i+1} - \gamma_i)^2}$$

101 The genealogical data takes the form  $\mathcal{G} = (c_{1:(n-1)}, s_{1:n})$  where  $c$  and  $s$  are  
102 respectively ordered coalescent times (internal nodes of the genealogy) and sampling times  
103 (terminal nodes of the genealogy). In the coalescent framework, the sampling times are  
104 usually considered to be fixed, so that  $p(s) = 1$  and  $p(\mathcal{G}) = p(c|s)$ . Alternatively, in some  
105 variations of this model, a prior  $p(s|Ne)$  is also provided for the sequence of sampling  
106 times, making this approach similar to but more flexible than sampling-birth-death-models  
107 (Karcher et al. 2016; Volz and Frost 2014).

Given a genealogy, the posterior distribution of the parameters  $\tau$  and  $\gamma_{1:m}$  is decomposed as:

$$p(\gamma_{1:m}, \tau|\mathcal{G}) \propto p(\mathcal{G}|\gamma_{1:m})p(\gamma_{1:m}|\tau)p(\tau) \quad (3)$$

108 The second term is given by Equation 2 and the last term by the prior on  $\tau$ . To assist with

109 the definition of the first term, we first denote  $A(t)$  to be the number of extant lineages at  
110 time  $t$ :

$$A(t) = \sum_{i=1}^n I(s_i > t) - \sum_{i=1}^{n-1} I(c_i > t) \quad (4)$$

where  $I(x)$  is an indicator function equal to one when  $x$  is true and equal to zero otherwise. The probability density of the genealogical data given the population size history  $\gamma_{1:m}$  is then equal to (Griffiths and Tavaré 1994):

$$p(\mathcal{G}|\gamma_{1:m}) = \prod_{i=1}^{2n-2} \left( I(t_i \in c_i) \frac{\binom{A(t_i)}{2}}{\text{Ne}(t_{i+1})} e^{-\int_{t_i}^{t_{i+1}} -\left(\frac{A(t)}{2}\right) \frac{1}{\text{Ne}(t)} dt} \right. \\ \left. + (1 - I(t_i \in c_i)) e^{-\int_{t_i}^{t_{i+1}} -\left(\frac{A(t)}{2}\right) \frac{1}{\text{Ne}(t)} dt} \right) \quad (5)$$

111 where  $t_{1:(2n-1)} = c_{1:(n-1)} \cup s_{1:n}$  is the set union of sample and coalescent times in descending  
112 order.

### 113 *Relationship between the growth rate of effective population size and* 114 *epidemic properties*

115 Several recent studies have investigated the relationship between the effective population  
116 size of a pathogen and the number of infected hosts (Koelle et al. 2011; Dearlove and  
117 Wilson 2013; Rosenberg and Nordborg 2002). A simple link between these quantities does  
118 not exist, since the relationship depends on how incidence and epidemic size change  
119 through time (Volz et al. 2009), population structure (Volz 2012), and complex evolution of  
120 the pathogen within hosts (Didelot et al. 2016; Volz et al. 2017). Under idealized  
121 situations, there is however a simple relationship between the growth rate of effective  
122 population size and the growth rate of an epidemic (Frost and Volz 2010; Volz et al. 2013).

123 Let  $Y(t)$  and  $\beta(t)$  denote the number of infected hosts and per-capita transmission  
124 rate, respectively, as functions of time. Note that  $\beta(t)$  may depend on the density of  
125 susceptible individuals in the population, as in the common susceptible-infected-removed  
126 (SIR) model, in which case  $\beta(t) \propto S(t)/N$  (Allen 2008). The coalescent rate for an  
127 infectious disease epidemic was previously derived under the assumption that within-host  
128 effective population size is negligible and that super-infection does not occur (Volz et al.  
129 2009; Frost and Volz 2010):

$$\lambda(t) = \binom{A(t)}{2} \frac{2\beta(t)}{Y(t)} \quad (6)$$

130 Equating this rate with the coalescent rate under the coalescent model  $\lambda(t) = \binom{A(t)}{2} / \text{Ne}(t)$   
131 (Kingman 1982) yields the following formula for the effective population size:

$$\text{Ne}(t) = \frac{Y(t)}{2\beta(t)} \quad (7)$$

132 Differentiating with respect to time (denoting with a dot superscript) yields:

$$\dot{\text{Ne}}(t) = \frac{\dot{Y}(t)}{2\beta(t)} - \frac{\dot{\beta}(t)Y(t)}{2(\beta(t))^2} \quad (8)$$

133 Note that in general the growth rate of the effective population size does not correspond to  
134 the growth rate of  $Y$ , however if the per-capita transmission rate is constant ( $\dot{\beta} = 0$ ), we  
135 have  $\dot{\text{Ne}} = \dot{Y}/(2\beta) \propto \dot{Y}$ . Thus, we expect that over phases of the epidemic where  
136 per-capita transmission rates are nearly constant there will be close correspondence  
137 between the growth or decline of the effective population size and the growth or decline of  
138 the unobserved number of infected hosts. This condition is often satisfied near the  
139 beginning of an outbreak which has an exponential phase. It is also often satisfied towards  
140 the end of epidemics when the epidemic size is decreasing at a constant exponential rate.

141 The basic reproduction number  $R_0$  describes the expected number of transmission



142 events caused by a single infected individual in an otherwise susceptible population. By  
143 extension, we can define  $R(t)$  as the expected number of transmissions by an infected host  
144 infected at time  $t$  (Fraser 2007). Assuming that all infected individuals are equally  
145 infectious (as is the case for example in the SIR model), we have that during periods when  
146 the epidemic growth rate is constant, each infected individual transmits at rate  
147  $\beta(t) = R(t)/\psi$  where  $\psi$  is the mean duration of infections. With these definitions, the  
148 number of infections  $Y(t)$  varies according to the following differential equation:

$$\dot{Y}(t) = Y(t) \frac{R(t) - 1}{\psi} \quad (9)$$

149 Combining Equations 7, 8 and 9 leads to the following approximate estimator for  
150 the reproduction number through time:

$$\hat{R}(t) = 1 + \psi \frac{\dot{N}e(t)}{N_e(t)} \quad (10)$$

151 This estimator makes use of the quantity  $\dot{N}e(t)/N_e(t)$  which will be estimated in our model  
152 below. Equation 10 is likely to be a good estimator over periods of the epidemic where  
153 per-capita transmission rates are invariant. A special case of this occurs at the start of an  
154 epidemic, in which case Equation 10 can be used to estimate the basic reproduction  
155 number  $R_0$ , as previously noted (Pybus 2001).

### 156 *A growth rate prior for effective population size*

157 We propose a model in which the growth rate of the effective population size is an  
158 autoregressive process with stationary increments. This growth rate is defined as:

$$\rho(t) = \frac{\dot{N}e(t)}{N_e(t)} \quad (11)$$

159 Note that  $\rho(t)$  is a real-valued quantity, with negative and positive values respectively  
160 indicating an increase and decrease in the effective population size. In particular, if the  
161 population is exponentially growing or declining from  $t = 0$  then we have  
162  $Ne(t) = Ne(0)\exp(\rho t)$  so that  $\rho(t) = \rho$  at every time  $t \geq 0$ . More generally, we model  $\rho(t)$   
163 using a BM process:  $\rho(t) \sim \text{BM}(\tau)$  (cf Equation 1). To facilitate statistical inference, we  
164 work with a discretized time axis with  $m$  intervals of length  $h$  as in the *skygrid* model (Gill  
165 et al. 2013). We define the growth rate in time interval  $i$  as:

$$\rho_i = \frac{Ne_{i+1} - Ne_i}{hNe_i} \quad (12)$$

166 We use the following approximate model for  $p(\rho_{i+1}|\rho_i)$ :

$$\rho_{i+1} \sim \rho_i + \mathcal{N}(0, h/\tau) \quad (13)$$

167 Note that Equation 12 implies  $\rho_i \in (-1/h, \infty)$  since Ne cannot decline below zero, whereas  
168 the approximate model in Equation 13 assumes support on the entire real line. We have  
169 found performance with this approximate model to be superior to exact models on the log  
170 transformation of Ne provided that  $h$  is small.

With the above definitions, the prior density of a sequence  $\rho_{1:m}$  is defined in terms of the increments:

$$p(\rho_{1:m}|\tau) \propto \prod_{i=1}^{m-2} p(\rho_{i+1} - \rho_i|\tau) \quad (14)$$

where

$$p(\rho_{i+1} - \rho_i|\tau) = \sqrt{\frac{\tau}{2\pi h}} e^{-\frac{\tau}{2h}(\rho_{i+1}-\rho_i)^2}$$

171 This equation can be compared with the *skygrid* density, Equation 2.

172

## *Incorporating covariates into phylodynamic inference*

A simple model was recently proposed for incorporating time-varying covariates into phylodynamic inference with *skygrid* models (Gill et al. 2016). Suppose we observe  $q$  covariates at  $m$  time points denoted  $X = (X_{1:m,1:q})$ , and such that observation times correspond to the grid used in the phylodynamic model. The following linear model for the marginal distribution of  $\gamma$  with covariate vector  $\alpha_{1:q}$  was proposed:

$$p(\gamma_i|X, \alpha_{1:q}, \epsilon) \sim \mathcal{N}(\alpha_0 + X_{i,1:q}\alpha_{1:q}, \epsilon) \quad (15)$$

173 where  $\alpha_0$  is the expected mean of  $\gamma$  without covariate effects.

This implies, along with the BM model, the following marginal distribution of the increments:

$$p(\gamma_{i+1} - \gamma_i|X, \alpha_{1:q}, \tau, \epsilon) \sim \mathcal{N}(X_{i+1,1:q}\alpha_{1:q} - X_{i,1:q}\alpha_{1:q}, h/\tau + 2\epsilon) \quad (16)$$

When covariates are likely to be associated with growth rates of the effective population size instead of the logarithm of the effective population size, we can analogously define the density of increments of  $\rho$ :

$$p(\rho_{i+1} - \rho_i|X, \alpha_{1:q}, \tau, \epsilon) \sim \mathcal{N}(X_{i+1,1:q}\alpha_{1:q} - X_{i,1:q}\alpha_{1:q}, h/\tau + 2\epsilon) \quad (17)$$

174 When fitting this model, we drop  $\epsilon$  for simplicity (as in Gill et al. 2016), and estimate a  
175 single variance parameter  $\tau$ .

176

## *Inference and software implementation*

177 Our growth rate model is implemented in an open-source R package called *skygrowth*,  
178 available from <https://mrc-ide.github.io/skygrowth/>, and which includes both

179 maximum a posteriori (MAP) and Bayesian Markov Chain Monte Carlo (MCMC) methods  
180 for model fitting.

181 The MCMC procedure uses a Gibbs-within-Metropolis algorithm that alternates  
182 between sampling the growth rate vector  $\rho_{1:m}$  and sampling of the precision parameter  $\tau$ .  
183 Metropolis-Hastings sampling is also performed for regression coefficients  $\alpha_{1:q}$  if covariate  
184 data is provided with univariate normal proposals. The elements of  $\rho_{1:m}$  are sampled in  
185 sequence (from past to present), and multiple Gibbs iterations (by default one hundred)  
186 are performed before updating other parameters using Metropolis-Hastings steps.

187 Maximum a posteriori (MAP) is used as a starting point for the MCMC. The MAP  
188 estimator alternates between optimisation of  $\gamma_{1:m}$  using gradient descent (*BFGS* in R,  
189 Goldfarb 1970) and univariate optimisation of  $\tau$  until convergence in the posterior is  
190 observed. Approximate credible intervals are provided for the MAP estimator based on  
191 curvature of the posterior around the optimum.

## 192 RESULTS

### 193 *Simulations*

194 We evaluated the ability of the *skygrowth* model to infer epidemic trends by simulating  
195 partially-sampled genealogies from a stochastic individual-based  
196 susceptible-infected-recovered (SIR) model. Simulated data were generated using the  
197 BEAST2 package MASTER (Vaughan and Drummond 2013), and code to reproduce  
198 simulated results is available at <https://github.com/emvolz/skygrowth-experiments>.  
199 The *skygrowth* model was also compared to *skygrid* model as implemented in the *phylodyn*  
200 R package (Karcher et al. 2016, 2017) which estimates effective population size using a fast  
201 approximate Bayesian non-parametric reconstruction (BNPR). The SIR model was density

202 dependent with a reaction rate  $\beta S(t)I(t)$  of generating new infections. Figure 1 shows  
203 results of a single simulation with  $R_0 = 1.3$  and 10,000 initial susceptible individuals.  
204 Additional simulations are shown in supporting Figure S1. Estimates with *skygrowth* were  
205 obtained using the MCMC algorithm and an Exponential(0.1) prior on the precision  
206 parameter. We report the posterior means from both *skygrowth* and *skygrid* BNPR.  
207 Genealogies were reconstructed by sampling 200 or 1000 infected individuals at random  
208 from the entire history of the epidemic. In this scenario, both the *skygrowth* and  
209 *skygrid* models reproduce the true epidemic trend, capturing both the rate of initial  
210 exponential increase, the time of peak prevalence, and the rate of epidemic decline.  
211 However, when sampling only 200 lineages (Figure 1A), the genealogy contains relatively  
212 little information about later epidemic dynamics, and the *skygrid* estimates revert to a  
213 stationary prior producing an unrealistic levelling-off of  $N_e$ . Estimates using the  
214 *skygrid* BNPR model were highly similar to results using an exact MCMC algorithm for  
215 sampling the posterior also included in the *phylodyn* package.

216 While the results in Figure 1A and B suggest that  $N_e(t)$  can serve as a very effective  
217 proxy for epidemic size, the degree of correspondence will depend on details of the epidemic  
218 model as discussed in the Methods section. Figure 1C and supporting Figure S2 shows a  
219 scenario where estimates of  $N_e(t)$  capture the initial rate of exponential growth but fail to  
220 estimate the time of peak epidemic prevalence, and the *skygrid* model also fails to detect  
221 that the epidemic ever decreases. This scenario was based on a higher  $R_0 = 5$  and only  
222 2,000 initially susceptible individuals, such that almost all hosts are eventually infected and  
223 the rate of epidemic decline predominantly reflects the host recovery rate. This is easily  
224 understood using the formula  $N_e(t) \propto I(t)/S(t)$  (cf. Equation 7). When  $R_0$  is large,  $S(t)$   
225 will change drastically over the course of the epidemic. In the later stages, almost all hosts  
226 have been infected so that  $1/S(t)$  is large, producing correspondingly large effective  
227 population sizes.

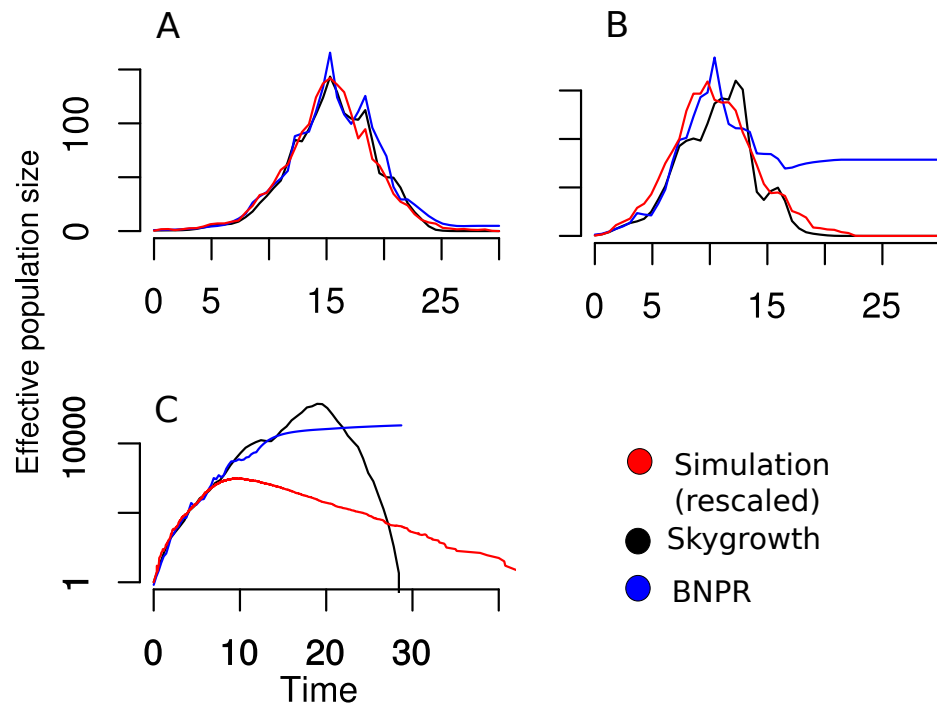

Figure 1: Comparison of effective population size estimates using the *skygrowth* and *skygrid* models applied to data from a susceptible-infected-recovered simulated epidemic. Effective population size estimates are also compared to the number of infected hosts through time under a linear rescaling (red). A. Estimates using a SIR model and simulated genealogy with 1000 sampled lineages and  $R_0 = 1.3$ . B. Estimates using a SIR model and simulated genealogy with 200 sampled lineages and  $R_0 = 1.3$ . C. Estimates using a SIR model and simulated genealogy with 200 sampled lineages and  $R_0 = 5$ .

228

## *Rabies virus*

229 An epidemic of rabies broke out in the late 1970s in the North American raccoon  
230 population, following the emergence of a host-adapted variant of the virus called RRV. By  
231 the end of the 1990s, this outbreak had spread to a vast geographical area including all  
232 Northeast and mid-Atlantic US states (Childs et al. 2000). A sample of 47 RRV isolates  
233 has been sequenced in a previous study (Biek et al. 2007), and BEAST (Drummond et al.  
234 2012) was used to reconstruct a dated phylogenetic tree. A standard *skyline* analysis  
235 (Drummond et al. 2005) was performed, which visually suggested a correlation between the  
236 inferred effective population size ( $N_e$ ) and the monthly area newly affected by RRV  
237 (hereafter denoted  $V$ ), but without attempting to quantify the strength or significance of  
238 this association.

239 This data was recently reanalysed using the *skygrid* model with covariates (Gill  
240 et al. 2016). No significant association was found between  $N_e$  and  $V$ , but the authors noted  
241 that since  $V$  is the newly affected area,  $V$  would be expected to be associated with a  
242 change in  $N_e$  rather than  $N_e$  itself. Since the *skyride* method is focused on  $N_e$ , like all  
243 previous phylodynamic methods, the authors considered the cumulative distribution of  $V$   
244 and showed that this is slightly associated with  $N_e$  (with a 95% credible interval of  
245 [0.18-2.86] on the covariate effect size, Gill et al. 2016). However, this approach is not fully  
246 satisfactory. In particular, since  $V$  is always positive, the cumulative distribution of  $V$  is  
247 always increasing, whereas  $N_e$  is in principle equally likely to increase or decrease over  
248 time. Furthermore both  $V$  and its cumulative distribution were considered on a logarithm  
249 scale, so that the latter flattens over time by definition.

250 A more natural solution is to keep the covariate  $V$  untransformed, and investigate  
251 its association with the growth rate  $\rho(t)$  rather than  $N_e(t)$  as implemented in our  
252 methodology (Figure 2). For this analysis we used exactly the same dated phylogeny as  
253 previously published (Biek et al. 2007) (reproduced in Supporting Figure S3). When the

254 covariate was not used (red results in Figure 2), the growth rate was inferred to be positive  
255 but declining progressively to zero from 1973 to  $\sim$ 1983, then stable around zero up to  
256  $\sim$ 1990, followed by a period of positive growth until  $\sim$ 2000, after which the growth rate  
257 decreased below zero. This implies that the effective population size increased from 1973 to  
258  $\sim$ 1983, then was stable until  $\sim$ 1990, increased to a peak in  $\sim$ 1997 and afterwards  
259 decreased. Two waves of spread have therefore been inferred as in previous analyses (Biek  
260 et al. 2007; Gill et al. 2016), with the first one starting in the 1970s and ending in  $\sim$ 1983  
261 and the second one lasting from  $\sim$ 1990 to  $\sim$ 1997.

262         Unfortunately the covariate data  $V$  starts in September 1978 and therefore does not  
263 cover the first wave. However, the covariate data shows that the epidemic was spreading  
264 very quickly between 1992 and 1997, much faster than before or after these dates, and this  
265 timing corresponds fairly precisely to the second wave of spread. When the covariate data  
266 was integrated into phylodynamic inference, the covariate effect size was found to be  
267 statistically significant but only slightly so, with a large 95% credible interval for the  
268 covariate effect size of [0.03-4.61] and posterior mean of 1.09. The reconstructed growth  
269 rate and effective population size when using the covariate data (blue results in Figure 2)  
270 were compatible with results without covariate data. Using additional informative data  
271 tightens the credible interval as would be expected, except in the second wave during which  
272 the covariate data suggests higher values for both the growth rate and effective population  
273 size. The mean posterior growth rate reached a value of about 2.5 per year in the 1990s  
274 (Figure 2) and the average generation time of raccoon rabies has previously been estimated  
275 to be around 2 months (Biek et al. 2007). We can use Equation 10 to infer a reproduction  
276 number of  $R = 1.4$ , slightly higher than a previous estimate around  $R = 1.1$  based on the  
277 same data (Biek et al. 2007).

278         One of the main novel findings of our analysis is that we found a significant decline  
279 of the effective population size of raccoon rabies post-2000, whereas previous phylodynamic



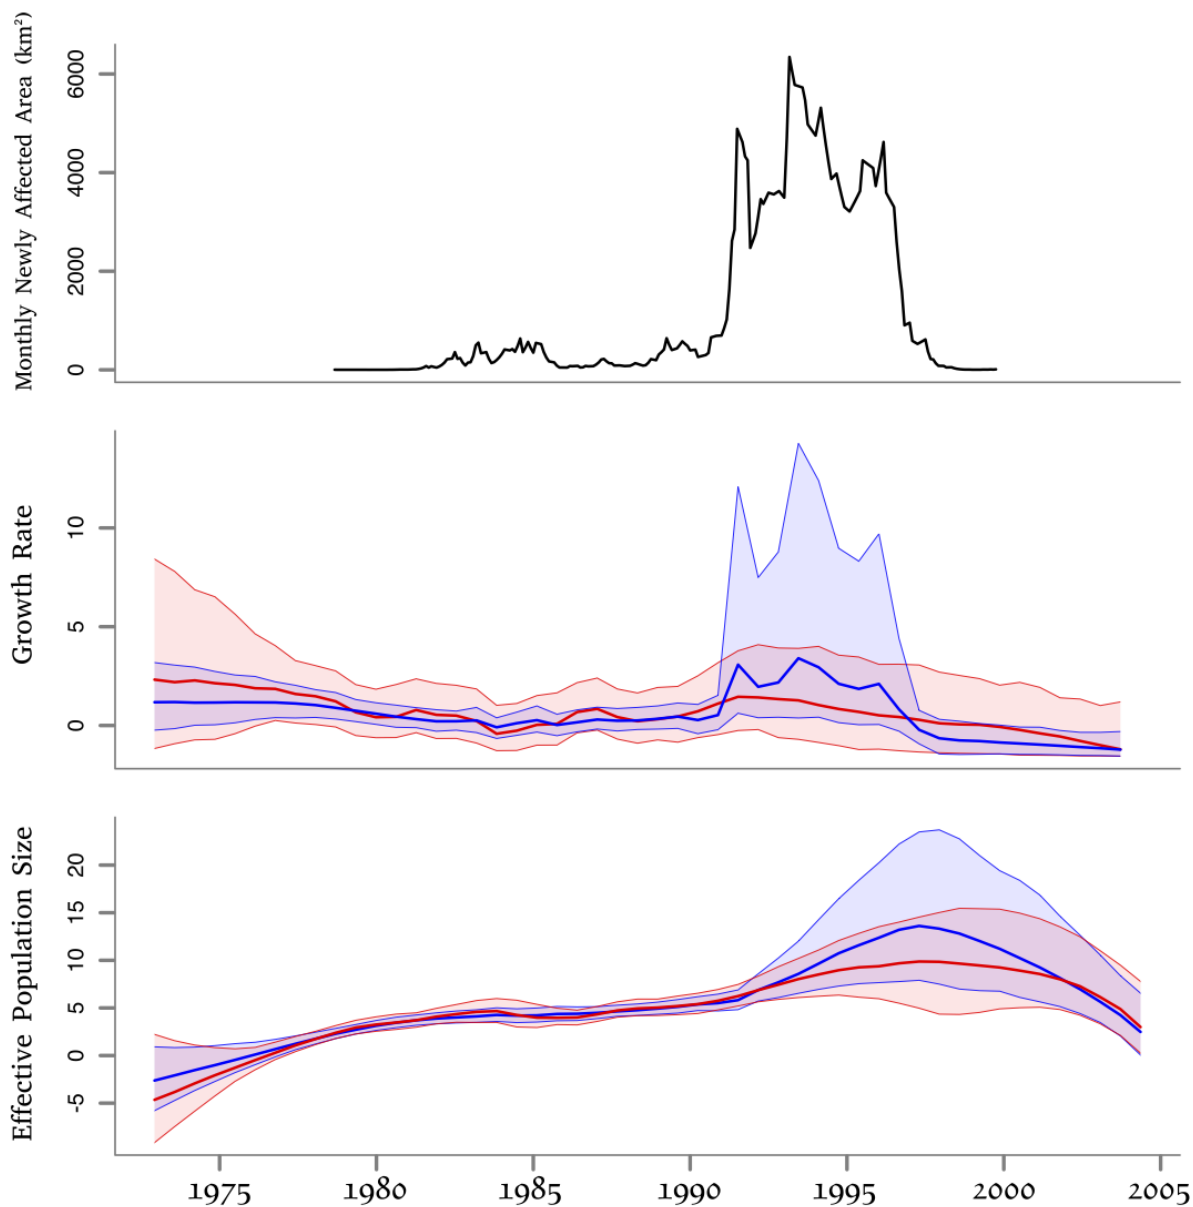

Figure 2: Results on the rabies application. Top: covariate data, representing the area in km<sup>2</sup> newly affected by rabies recorded monthly between September 1978 and October 1999. Middle: growth rate estimates. Bottom: log effective population size estimates. The middle and bottom plots show results without (red) and with (blue) the use of the covariate data, and with a solid line indicating posterior means and shaded areas indicating the 95% credible regions.

280 studies based on the same data found this to be constant (Biek et al. 2007; Gill et al.  
281 2016). Previous methods consider a Brownian motion on the logarithm of  $N_e$ , which results  
282 in a strong prior that  $N_e$  is constant in recent time. By contrast, our model results in the  
283 growth rate being a-priori constant, so that the clear decline in growth rate started in the  
284 mid-1990s is likely to have continued to the point that the growth rate became negative  
285 and  $N_e$  declined. Our result is in good agreement with CDC surveillance that shows a clear  
286 decline in rabid raccoons after the peak in the mid-1990s (Monroe et al. 2016).

### 287 *Staphylococcus aureus* USA300

288 *Staphylococcus aureus* is a bacterium that causes infections ranging from mild skin  
289 infections to life-threatening septicaemia. In the 1980s and 1990s, several variants of *S.*  
290 *aureus* have emerged that are resistant to methicilin and other  $\beta$ -lactam antibiotics, and  
291 collectively called methicilin-resistant *S. aureus* (MRSA) (Chambers and Deleo 2009).  
292 MRSA are well known as a leading cause of hospital infections worldwide, but the MRSA  
293 variant called USA300 differs from most others by causing infections mostly in  
294 communities rather than hospitals. USA300 was first reported in 2000, and has since  
295 spread throughout the USA and internationally (Tenover and Goering 2009). A recent  
296 study sequenced the genomes from 387 isolates of USA300 sampled from New York  
297 between 2009 and 2011, and reconstructed phylogeographic spread that frequently involved  
298 transmission within households (Uhlemann et al. 2014).

299 The USA300 phylogenetic tree (Uhlemann et al. 2014) was dated using a previously  
300 described method (Didelot et al. 2012) and a clock rate of  $\sim 3$  substitutions per year for  
301 USA300 (Uhlemann et al. 2014; Alam et al. 2015). We analysed the resulting dated  
302 phylogeny (Supporting Figure S4) using our phylodynamic methodology (Figure 3). We  
303 initially performed this analysis without the use of any covariate data (red results in Figure  
304 3) and found that the growth rate had been around zero up until 1985, after which it

305 steadily increased until  $\sim$ 1995, and subsequently decreased almost linearly, becoming  
306 negative in  $\sim$ 2002 and continuing to decrease afterwards. The effective population size was  
307 accordingly found to have been very small until the mid-1990s, to have peaked in  $\sim$ 2002  
308 and to have declined since. These results are in very good agreement with a phylodynamic  
309 analysis of USA300 performed using a traditional *skyline* plot on a different genomic  
310 dataset (Glaser et al. 2016) as well as USA300 incidence trends (Planet 2017). However,  
311 the causes for the recent decline in USA300 are still unclear (Planet 2017). Declines in  
312 other MRSA lineages were recently described (Ledda et al. 2017) and have been attributed  
313 to improved hospital infection control measures, but this does not apply to the  
314 community-associated USA300 lineage.

315 We hypothesized that the dynamics of USA300 may be driven by the consumption  
316 of  $\beta$ -lactams in the USA, and we therefore gathered data on this from three different  
317 sources covering respectively the periods between 1980 and 1992 (McCaig and Hughes  
318 1995), between 1992 and 2000 (McCaig et al. 2003) and between 2000 and 2012 (CDDEP  
319 2017). There was an overlap of one year between the first and second, and between the  
320 second and third of these sources, which was used to scale data for consistency between the  
321 three sources. Specifically, values from the second source were scaled so that the 2000 value  
322 is equal to the one in the third source, and values from the first source were then scaled so  
323 that the 1992 value is equal to the one in the second source. The rescaled data is therefore  
324 measured as in the third source, namely in standard units of  $\beta$ -lactams (ie narrow-spectrum  
325 and broad spectrum penicilins plus cephalosporins) consumed per 1000 population in the  
326 USA (CDDEP 2017). This data show that the consumption of  $\beta$ -lactams almost doubled  
327 between 1980 and 1991, and subsequently decreased to reach around 2010 levels comparable  
328 to the early 1980s (Figure 3). These trends on  $\beta$ -lactams consumption therefore appear to  
329 be very similar to the ones observed for the USA300 growth rate without the use of  
330 covariates (red results in Figure 3). To confirm this observation, we repeated our

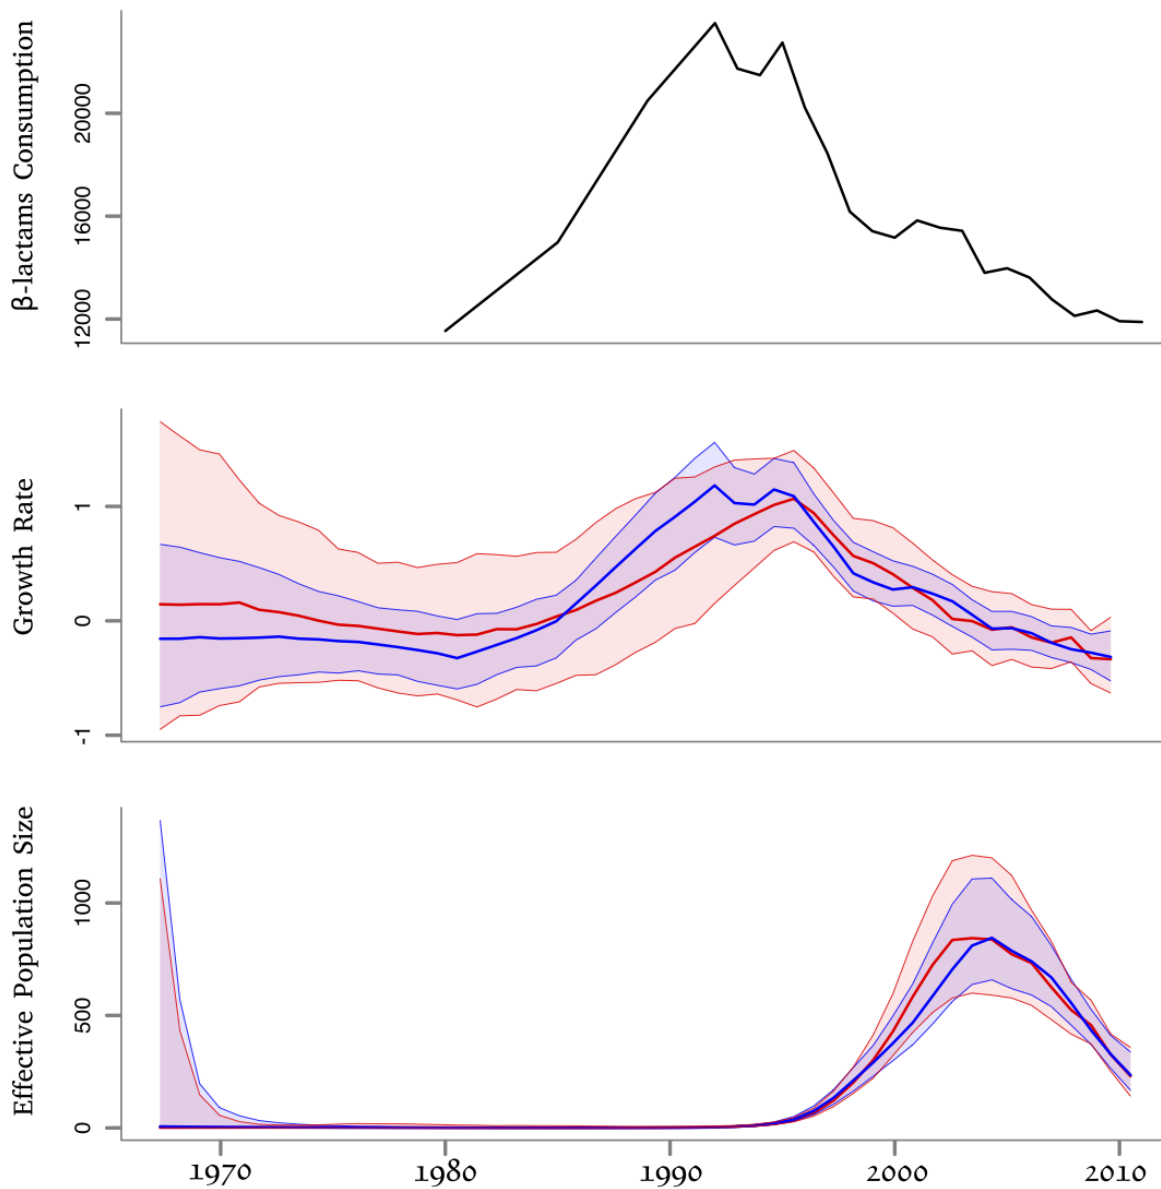

Figure 3: Results on the USA300 application. Top: covariate data, representing the consumption of  $\beta$ -lactams between 1980 to 2012 in the USA, measured in standard units per 1000 population. Middle: growth rate estimates. Bottom: log effective population size estimates. The middle and bottom plots show results without (red) and with (blue) the use of the covariate data, and with a solid line indicating posterior means and shaded areas indicating the 95% credible regions.

331 phylodynamic analysis with integration of the  $\beta$ -lactam use as a covariate (blue results in  
332 Figure 3). We found that the covariate was significantly associated with growth rate, with  
333 a mean posterior effect of 0.48 and 95% credible interval [0.18-0.71]. The growth rate  
334 dynamics inferred when using covariate data was almost identical to those inferred without  
335 the use of covariate data, except for a clear reduction of the width of the intervals which  
336 reflects the gain in information when combining two independent types of data.

337 Our analysis therefore suggests that the rise in  $\beta$ -lactams consumption in the 1980s  
338 was responsible for the emergence of the highly successful USA300 lineage. From the  
339 mid-1990s, the use of  $\beta$ -lactams has declined, both due to an overall reduction in antibiotic  
340 use and a diversification of the type of antibiotics prescribed (McCaig et al. 2003; CDDEP  
341 2017), and the growth rate of USA300 has consequently decreased. Importantly, the  
342 consumption of antibiotics is expected to be associated with the growth rates of resistant  
343 bacterial pathogens, rather than with their effective population sizes, which here is not at  
344 all correlated with the covariate (Figure 3). Amongst pairs of individuals thought to have  
345 infected one another within households, the distribution of genomic distance had a mean of  
346 4 substitutions (Uhlemann et al. 2014), and this represents on average twice the number of  
347 substitutions occurring during an infection when accounting for within-host diversity  
348 (Didelot et al. 2012, 2014, 2016). Given that the molecular clock rate of USA300 is  
349 approximately 3 substitutions per year (Uhlemann et al. 2014; Alam et al. 2015), the  
350 average duration of infections in this outbreak is around eight months. In the first half of  
351 the 1990s, the growth rate peaked around 1 per year (Figure 3) and using Equation 10 we  
352 estimate that the reproduction number was around  $R = 1.6$ , which is in good agreement  
353 with the recent estimate  $R = 1.5$  for MRSA in the US population (Hogea et al. 2014). The  
354 fact that this estimate is only modestly above the minimum threshold of  $R = 1$  required for  
355 outbreaks to take place could help explain why the USA300 is declining, even though  
356  $\beta$ -lactams are still widely used. The consumption level may have lowered below the

357 threshold caused by the fitness cost of resistance, as previously discussed for other resistant  
358 bacteria (Whittles et al. 2017; Dingle et al. 2017).

## 359 DISCUSSION

360 Many environmental covariates, particularly those with a mechanistic influence on  
361 replicative fitness of pathogens, are closely related to the growth rate of epidemic size but  
362 not necessarily related to absolute epidemic size. We have found that these relationships  
363 can be inferred from random samples of pathogen genetic sequences by relating  
364 environmental covariates to the growth rate of the effective population size. This enables  
365 the estimation of the fitness effect of environmental covariates as well as the prediction of  
366 future epidemic dynamics should conditions change. We have found a clear and highly  
367 significant relationship between the growth and decline of community-associated MRSA  
368 USA300 and the population-level prescription rates of  $\beta$ -lactam antibiotics (Figure 3). This  
369 relationship is not apparent when comparing antibiotic usage directly with the effective  
370 population size of MRSA USA300. Our methodology focused on growth rate is therefore  
371 well suited to investigate the drivers of antibiotic resistance, compared to previous  
372 phylodynamic methods focused on the effective population size.

373 The *skygrowth* model can provide a more realistic prior for many infectious disease  
374 epidemics where the growth rate of epidemic size is likely to approach stationarity as  
375 opposed to the absolute effective population size. Conventional *skyride* and *skygrid* models  
376 are prone to erroneously estimating a stable effective population size when genealogical  
377 data is uninformative, as for example when estimating epidemic trends in the latter stages  
378 of SIR epidemics (Figure 1). The *skygrowth* model will correctly predict epidemic decline  
379 in this situation. Moreover, under ideal conditions, the estimated growth rate can be  
380 related to the reproduction number of an epidemic, and the *skygrowth* model provides a

381 simple non-parametric estimator of the reproduction number through time given additional  
382 information about the natural history of infection (Equation 10). Caution should be  
383 exercised when using the effective population size as a proxy for epidemic size, as the  
384 relationship between the two is complex (cf. Simulation results). In general, there will be  
385 close correspondence between the growth of epidemic size and growth of effective  
386 population size during periods where the growth rate is relatively constant.

387         The methods presented here can be applied more generally to evaluate the role of  
388 antibiotic stewardship, vaccine campaigns, or other public health interventions on epidemic  
389 growth rates. Some environmental covariates, such as independent prevalence estimates,  
390 may be more closely related to effective population size rather than growth rates, and  
391 future work is indicated on the development of regression models in terms of both  
392 statistics. More complex stochastic models can also be considered, such as processes with  
393 both autoregressive and moving average components. A variety of mathematical models  
394 have been developed to explain de novo evolution of antimicrobial resistance as a function  
395 of population-level antimicrobial usage (Bonhoeffer et al. 1997; Austin et al. 1999;  
396 Spicknall et al. 2013; Whittles et al. 2017), and an important direction for future work will  
397 be the development of parametric and semi-parametric structured coalescent models (Volz  
398 2012) that can be applied to bacterial phylogenies featuring a mixture of antibiotic  
399 sensitive and resistant lineages. This methodology will allow us to estimate key  
400 evolutionary parameters, such as the fitness cost and benefit of resistance, or the rate of  
401 mutation from sensitive to resistant status, which are needed to make well informed  
402 recommendations on resistance control strategies.

\*

403

404 References

- 405 Alam, M. T., T. D. Read, R. A. Petit, S. Boyle-Vavra, L. G. Miller, S. J. Eells, R. S.  
406 Daum, and M. Z. David. 2015. Transmission and microevolution of USA300 MRSA in  
407 U.S. households: Evidence from whole-genome sequencing. *MBio* 6:1–10.
- 408 Allen, L. 2008. An introduction to stochastic epidemic models. Pages 81–130 *in* *Math.*  
409 *Epidemiol.* vol. 1945 of *Lecture Notes in Mathematics*. Springer Berlin Heidelberg.
- 410 Austin, D. J., K. G. Kristinsson, and R. M. Anderson. 1999. The relationship between the  
411 volume of antimicrobial consumption in human communities and the frequency of  
412 resistance. *PNAS* 96:1152–1156.
- 413 Baele, G., M. A. Suchard, A. Rambaut, and P. Lemey. 2016. Emerging concepts of data  
414 integration in pathogen phylodynamics. *Systematic biology* 66:e47–e65.
- 415 Biek, R., J. C. Henderson, L. a. Waller, C. E. Rupprecht, and L. a. Real. 2007. A  
416 high-resolution genetic signature of demographic and spatial expansion in epizootic  
417 rabies virus. *Proc Natl Acad Sci USA* 104:7993–8.
- 418 Bonhoeffer, S., M. Lipsitch, and B. R. Levin. 1997. Evaluating treatment protocols to  
419 prevent antibiotic resistance. *Proc Natl Acad Sci U S A* 94:12106–12111.
- 420 CDDEP. 2017. The Center for Disease Dynamics Economics and Policy. ResistanceMap,  
421 available at <http://resistancemap.cddep.org/>, accessed July 2017.
- 422 Chambers, H. F. and F. R. Deleo. 2009. Waves of resistance: *Staphylococcus aureus* in the  
423 antibiotic era. *Nat. Rev. Microbiol.* 7:629–41.



- 424 Childs, J. E., A. T. Curns, M. E. Dey, L. A. Real, L. Feinstein, O. N. Bjornstad, and J. W.  
425 Krebs. 2000. Predicting the local dynamics of epizootic rabies among raccoons in the  
426 United States. *Proc. Natl. Acad. Sci.* 97:13666–13671.
- 427 de Silva, E., N. M. Ferguson, and C. Fraser. 2012. Inferring pandemic growth rates from  
428 sequence data. *Journal of The Royal Society Interface* Page rsif20110850.
- 429 Dearlove, B. and D. Wilson. 2013. Coalescent inference for infectious disease: meta-analysis  
430 of hepatitis C. *Philos. Trans. R. Soc. B Biol. Sci.* 368:20120314.
- 431 Didelot, X., D. W. Eyre, M. Cule, C. L. C. Ip, M. A. Ansari, D. Griffiths, A. Vaughan,  
432 L. O'Connor, T. Golubchik, E. M. Batty, P. Piazza, D. J. Wilson, R. Bowden, P. J.  
433 Donnelly, K. E. Dingle, M. Wilcox, A. S. Walker, D. W. Crook, T. E. Peto, and R. M.  
434 Harding. 2012. Microevolutionary analysis of *Clostridium difficile* genomes to investigate  
435 transmission. *Genome Biol* 13:R118.
- 436 Didelot, X., J. Gardy, and C. Colijn. 2014. Bayesian inference of infectious disease  
437 transmission from whole genome sequence data. *Mol. Biol. Evol.* 31:1869–1879.
- 438 Didelot, X., A. S. Walker, T. E. Peto, D. W. Crook, and D. J. Wilson. 2016. Within-host  
439 evolution of bacterial pathogens. *Nat. Rev. Microbiol.* 14:150–162.
- 440 Dingle, K. E., X. Didelot, T. P. Quan, D. W. Eyre, N. Stoesser, T. Golubchik, R. M.  
441 Harding, D. J. Wilson, D. Griffiths, A. Vaughan, and Others. 2017. Effects of control  
442 interventions on *Clostridium difficile* infection in England: an observational study.  
443 *Lancet Infect. Dis.* 17:411–421.
- 444 Drummond, A. J., A. Rambaut, B. Shapiro, and O. G. Pybus. 2005. Bayesian coalescent  
445 inference of past population dynamics from molecular sequences. *Mol. Biol. Evol.*  
446 22:1185–92.

- 447 Drummond, A. J., M. A. Suchard, D. Xie, and A. Rambaut. 2012. Bayesian phylogenetics  
448 with BEAUti and the BEAST 1.7. *Mol. Biol. Evol.* 29:1969–1973.
- 449 Fraser, C. 2007. Estimating individual and household reproduction numbers in an emerging  
450 epidemic. *PLoS One* 2:e758.
- 451 Frost, S. D. W. and E. M. Volz. 2010. Viral phylodynamics and the search for an 'effective  
452 number of infections'. *Phil. Trans. R. Soc. B* 365:1879–1890.
- 453 Gill, M. S., P. Lemey, S. N. Bennett, R. Biek, and M. A. Suchard. 2016. Understanding  
454 Past Population Dynamics : Bayesian Coalescent-Based Modeling with Covariates. *Syst.*  
455 *Biol.* 65:1041–1056.
- 456 Gill, M. S., P. Lemey, N. R. Faria, A. Rambaut, B. Shapiro, and M. A. Suchard. 2012.  
457 Improving bayesian population dynamics inference: a coalescent-based model for  
458 multiple loci. *Molecular biology and evolution* 30:713–724.
- 459 Gill, M. S., P. Lemey, N. R. Faria, A. Rambaut, B. Shapiro, and M. A. Suchard. 2013.  
460 Improving bayesian population dynamics inference: A coalescent-based model for  
461 multiple loci. *Mol. Biol. Evol.* 30:713–724.
- 462 Glaser, P., P. Martins-Simões, A. Villain, M. Barbier, A. Tristan, C. Bouchier, L. Ma,  
463 M. Bes, F. Laurent, D. Guillemot, T. Wirth, and F. Vandenesch. 2016. Demography and  
464 intercontinental spread of the USA300 community-acquired methicillin-resistant  
465 *Staphylococcus aureus* lineage. *MBio* 7:1–11.
- 466 Goldfarb, D. 1970. A family of variable-metric methods derived by variational means.  
467 *Mathematics of Computation* 24:23–26.
- 468 Griffiths, R. and S. Tavaré. 1994. Sampling theory for neutral alleles in a varying  
469 environment. *Philos. Trans. R. Soc. B Biol. Sci.* 344:403–410.

- 470 Ho, S. Y. and B. Shapiro. 2011. Skyline-plot methods for estimating demographic history  
471 from nucleotide sequences. *Molecular ecology resources* 11:423–434.
- 472 Hogeia, C., T. Van Effelterre, and C. J. Acosta. 2014. A basic dynamic transmission model  
473 of *Staphylococcus aureus* in the US population. *Epidemiol. Infect.* 142:468–478.
- 474 Karcher, M. D., J. A. Palacios, T. Bedford, M. A. Suchard, and V. N. Minin. 2016.  
475 Quantifying and mitigating the effect of preferential sampling on phylodynamic  
476 inference. *PLoS computational biology* 12:e1004789.
- 477 Karcher, M. D., J. A. Palacios, S. Lan, and V. N. Minin. 2017. phylodyn: an R package for  
478 phylodynamic simulation and inference. *Mol. Ecol. Resour.* 17:96–100.
- 479 Kingman, J. 1982. The coalescent. *Stoch. Process. their Appl.* 13:235–248.
- 480 Koelle, K., O. Ratmann, D. A. Rasmussen, V. Pasour, and J. Mattingly. 2011. A  
481 dimensionless number for understanding the evolutionary dynamics of antigenically  
482 variable RNA viruses. *Proc. R. Soc. B Biol. Sci.* 278:3723–3730.
- 483 Ledda, A., J. R. Price, K. Cole, M. J. Llewelyn, A. M. Kearns, D. W. Crook, J. Paul, and  
484 X. Didelot. 2017. Re-emergence of methicillin susceptibility in a resistant lineage of  
485 *Staphylococcus aureus*. *J. Antimicrob. Chemother.* 72:1285–1288.
- 486 McCaig, L. F., R. E. Besser, and J. M. Hughes. 2003. Antimicrobial drug prescription in  
487 ambulatory care settings, United States, 1992-2000. *Emerg. Infect. Dis.* 9:432–7.
- 488 McCaig, L. F. and J. M. Hughes. 1995. Trends in antimicrobial drug prescribing among  
489 office-based physicians in the United States. *J. Am. Med. Assoc.* 273:214–219.
- 490 Minin, V. N., E. W. Bloomquist, and M. A. Suchard. 2008. Smooth skyride through a  
491 rough skyline: Bayesian coalescent-based inference of population dynamics. *Molecular  
492 biology and evolution* 25:1459–1471.

- 493 Monroe, B., P. Yager, J. Blanton, M. Birhane, A. Wadhwa, L. Orciari, B. Petersen, and  
494 R. Wallace. 2016. Rabies surveillance in the United States during 2014. *J. Am. Vet. Med.*  
495 *Assoc.* 248:777–788.
- 496 Palacios, J. A. and V. N. Minin. 2013. Gaussian process-based bayesian nonparametric  
497 inference of population size trajectories from gene genealogies. *Biometrics* 69:8–18.
- 498 Planet, P. J. 2017. Life After USA300: The Rise and Fall of a Superbug. *J. Infect. Dis.*  
499 215:S71–S77.
- 500 Pybus, O. G. 2001. The Epidemic Behavior of the Hepatitis C Virus. *Science*  
501 292:2323–2325.
- 502 Pybus, O. G., A. Rambaut, and P. H. Harvey. 2000. An integrated framework for the  
503 inference of viral population history from reconstructed genealogies. *Genetics*  
504 155:1429–1437.
- 505 Rosenberg, N. A. and M. Nordborg. 2002. Genealogical trees, coalescent theory and the  
506 analysis of genetic polymorphisms. *Nat. Rev. Genet.* 3:380–90.
- 507 Spicknall, I. H., B. Foxman, C. F. Marrs, and J. N. S. Eisenberg. 2013. A modeling  
508 framework for the evolution and spread of antibiotic resistance: Literature review and  
509 model categorization. *Am. J. Epidemiol.* 178:508–520.
- 510 Strimmer, K. and O. G. Pybus. 2001. Exploring the demographic history of dna sequences  
511 using the generalized skyline plot. *Molecular Biology and Evolution* 18:2298–2305.
- 512 Tenover, F. C. and R. V. Goering. 2009. Methicillin-resistant *Staphylococcus aureus* strain  
513 USA300: Origin and epidemiology. *J. Antimicrob. Chemother.* 64:441–446.
- 514 Uhlemann, A.-C., J. Dordel, J. R. Knox, K. E. Raven, J. Parkhill, M. T. G. Holden, S. J.  
515 Peacock, and F. D. Lowy. 2014. Molecular tracing of the emergence, diversification, and

516 transmission of *S. aureus* sequence type 8 in a New York community. *Proc. Natl. Acad.*  
517 *Sci. U. S. A.* 111:6738–43.

518 Vaughan, T. G. and A. J. Drummond. 2013. A stochastic simulator of Birth–Death master  
519 equations with application to phylodynamics. *Mol. Biol. Evol.* 30:1480–1493.

520 Volz, E. M. 2012. Complex population dynamics and the coalescent under neutrality.  
521 *Genetics* 190:187–201.

522 Volz, E. M. and S. D. W. Frost. 2014. Sampling through time and phylodynamic inference  
523 with coalescent and birth – death models. *J. R. Soc. Interface* 11:20140945.

524 Volz, E. M., K. Koelle, and T. Bedford. 2013. Viral Phylodynamics. *PLoS Comput. Biol.*  
525 9:e1002947.

526 Volz, E. M., S. L. Kosakovsky Pond, M. J. Ward, A. J. Leigh Brown, and S. D. W. Frost.  
527 2009. Phylodynamics of infectious disease epidemics. *Genetics* 183:1421–30.

528 Volz, E. M., E. Romero-Severson, and T. Leitner. 2017. Phylodynamic Inference across  
529 Epidemic Scales. *Mol. Biol. Evol.* 34:1276–1288.

530 Whittles, L., P. White, and X. Didelot. 2017. Estimating the fitness cost and benefit of  
531 cefixime resistance in *neisseria gonorrhoeae* to inform prescription policy: a modelling  
532 study. *PLoS Medicine* .
